RESEARCH ARTICLE

# Attenuated viral strains of priority pathogens for potential use in controlled human infection model studies: A scoping review

David Oliver Hamilton<sup>1\*</sup>, Victoria Simpson<sup>1</sup>, Tilly Fox<sup>1</sup>, Vittoria Lutje<sup>1</sup>, Alain Kohl<sup>2</sup>, Daniela M. Ferreira<sup>1,3</sup>, Ben Morton<sup>1</sup>

**1** Department of Clinical Sciences, Liverpool School of Tropical Medicine, Liverpool, United Kingdom, **2** Centre for Neglected Tropical Diseases, Departments of Tropical Disease Biology and Vector Biology, Liverpool School of Tropical Medicine, Liverpool, United Kingdom, **3** Department of Paediatrics, Oxford Vaccine Group, University of Oxford, Oxford, United Kingdom

\* [oliver.hamilton@lstm.ac.uk](mailto:oliver.hamilton@lstm.ac.uk)

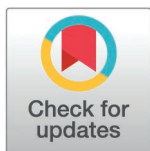

## Abstract

### Background

There are several known pathogens and families identified as high risk for pandemic potential. It is essential to study these pathogens and develop medical countermeasures to mitigate disease prior to potential pandemics. Controlled human infection models (CHIMs) using attenuated viral strains may offer an efficient and safe way to do this.

### Objective

Our aim was to systematically examine the literature for attenuated, but replication competent, strains of Coalition for Epidemic Preparedness Innovations (CEPI) identified priority pathogens (Ebola, Lassa virus, Nipah virus, Rift Valley fever virus, chikungunya virus and Middle East respiratory syndrome-related coronavirus) that have been administered to humans.

### Design

A comprehensive literature search of multiple databases was performed by an information specialist. All search results were screened by two authors against inclusion/exclusion criteria from a pre-specified protocol. The primary outcome was confirmation that the administered viral strain could subsequently be recovered from participants. The secondary outcome was attenuated virus safety.

### Results

Our searches yielded 13078 results and 5998 articles remained for screening after removing duplicates and animal studies. Subsequently, 351 articles were selected for

## OPEN ACCESS

**Citation:** Hamilton DO, Simpson V, Fox T, Lutje V, Kohl A, Ferreira DM, et al. (2026) Attenuated viral strains of priority pathogens for potential use in controlled human infection model studies: A scoping review. PLoS Negl Trop Dis 20(1): e0013243. <https://doi.org/10.1371/journal.pntd.0013243>

**Editor:** Gregory Gromowski, WRAIR, UNITED STATES OF AMERICA

**Received:** June 17, 2025

**Accepted:** December 15, 2025

**Published:** January 2, 2026

**Peer Review History:** PLOS recognizes the benefits of transparency in the peer review process; therefore, we enable the publication of all of the content of peer review and author responses alongside final, published articles. The editorial history of this article is available here: <https://doi.org/10.1371/journal.pntd.0013243>

**Copyright:** © 2026 Hamilton et al. This is an open access article distributed under the terms of the [Creative Commons Attribution License](https://creativecommons.org/licenses/by/4.0/), which permits unrestricted use, distribution,

and reproduction in any medium, provided the original author and source are credited.

**Data availability statement:** All relevant data are within the manuscript and [Supporting information](#) file.

**Funding:** The author(s) received no specific funding for this work.

**Competing interests:** The authors have declared that no competing interests exist.

full text review and nine were included for data extraction. Four distinct attenuated strains were identified across two priority pathogens – TSI-GSD-218 and VLA1553 for chikungunya virus and MP-12 and hRVFV-4s for Rift Valley Fever virus. Attenuated virus was recovered for each strain except hRVFV-4s. There were no major safety concerns for these identified strains in Phase 1–3 studies.

## Conclusions

We have identified three attenuated viral strains that may be amenable to development into novel CHIMs for two priority pathogens. Of these, VLA1553 for chikungunya is a licenced and commercially available vaccine product suitable for use in CHIM. There is a research gap for the creation of new attenuated mutants that could be utilised in CHIM for other priority pathogens.

### Author summary

There are several families of viruses that scientists predict are most likely to cause a future pandemic, such as coronaviruses or Ebola. Studying these viruses ahead of time might mean we have vaccines or drugs already available before an outbreak occurs.

Human challenge studies involve exposing healthy volunteers to germs that might make them sick and can be an efficient way of testing vaccines or treatments. It wouldn't be safe to do that for many illnesses that could cause a pandemic. However, it may be possible to use weakened versions of these viruses instead. We have performed a thorough search of scientific papers to look for candidates of weakened viruses to see if we could use them like this. The most promising is a version of the chikungunya virus that is currently used as a vaccine.

## 1. Introduction

Viruses with epidemic and pandemic potential risk destabilising international economies and social order; and could cause mass illness and deaths [1]. This threat is increased by anthropogenic climate change; land-use ecosystem changes, increased human and livestock populations; and potentially due to bioterrorism [2]. The Coalition for Epidemic Preparedness Innovations (CEPI) have targeted the manufacture of safe vaccines, therapeutics, and diagnostics within 100 days of identification of an emerging pandemic [3]. Modelling data suggests that over 8 million deaths and \$14 trillion could have been saved if this 100-day target had been met during the COVID-19 pandemic [4].

Whilst the causative organism of the next viral pandemic may be entirely novel (so called "Disease X" [2]), there are several known pathogens or families identified as

high risk for pandemic potential, particularly *coronaviridae*, *orthomyxoviridae* and *filoviridae* [1,5–7]. CEPI have defined nine diseases prioritised for development of medical countermeasures (MCMs) prior to a potential pandemic: Ebola virus disease (EVD); Lassa; mpox; Nipah; Rift Valley fever (RVF); chikungunya (CHIK); COVID-19; Middle East respiratory syndrome (MERS); and “Disease X” [5,8]. Development of MCMs against these viruses is essential to improve pandemic preparedness [1,5]. As occurred in the COVID-19 pandemic, knowledge gained from studying one of these viruses may also expedite MCM development if a novel pandemic virus were to emerge from a related family or genus [9,10].

Standard Phase 1–3 efficacy studies to develop experimental MCMs may be impossible due to limited or absent participants to enrol into trials prior to disease outbreaks. Controlled human infection models (CHIMs) may offer an efficient solution to this critical dilemma [11]. Traditionally, CHIMs involve deliberate exposure of an infectious dose of a pathogen to carefully selected volunteers [12]. CHIMs may significantly accelerate the development of MCMs in a safe, efficient and cost-effective way [13–15], for example by up- or down-selecting potential agents to ensure that only the most promising candidates are progressed to pivotal efficacy trials [14,16]. CHIM derived data has recently been used for regulatory approvals for VaxChora for travellers [17] and the World Health Organization (WHO) pre-qualification of the use of a typhoid conjugate vaccine (TypharTCV) in endemic regions [18,19]. It is recognised that CHIMs may support the emergency use of an investigational vaccine in a pandemic scenario [20] and therefore could be a crucial tool in pandemic preparedness [4,16].

Given the inherent risks from some of these priority pathogens, CHIMs that incorporate wild type viral infection would be unethical [21–23] and therefore novel approaches to study design are required. Previous studies have used attenuated versions of a disease-causing pathogen to mitigate these risks [14,21,24], usually repurposing an attenuated strain designed as a live-attenuated vaccine. This is sometimes termed ‘pseudochallenge’ [14]. The approach has been successful in CHIM with several other diseases, most notably dengue virus [25,26], as well as tuberculosis [27], influenza [28], rotavirus, and poliovirus [14]. Given the lack of precedent with CHIMs in these diseases and the presumed heterogeneity of studies, we have conducted a scoping review to systematically examine the literature for attenuated strains of CEPI priority pathogens that have already been administered to humans. This will identify candidates that may be developed into novel CHIMs to facilitate trials for MCMs.

## 2. Methods

The objectives, eligibility criteria and methods for this scoping review were specified in advance and published in a prospectively registered protocol on the Open Science Framework (<https://osf.io/nu3bf/>). The scoping review was conducted according to methodology from the JBI Manual for Evidence Synthesis [29] and incorporates the PRISMA Extension for Scoping Reviews (PRISMA-ScR) checklist [30] (see [S1 File](#)).

### 2.1. Search strategy and eligibility criteria

A comprehensive literature search was last performed on 24<sup>th</sup> February 2025 in the Cochrane Central Register of Controlled Trials (CENTRAL, published in the Cochrane Library), MEDLINE (via OVID), Embase (via OVID), Science Citation Index (Web of Science), CAB Abstracts & Global Health (Web of Science) databases. We also searched the WHO International Clinical Trials Registry Platform (ICTRP; [apps.who.int/trialsearch/](https://apps.who.int/trialsearch/)) and ClinicalTrials.gov (<https://clinicaltrials.gov/ct2/home>) for trials in progress. The full search terms used are included in the [S2 File](#). There were no restrictions on language, region, date, participant demographics, or publication status. Additionally, references of all identified reviews were also hand-searched to identify potential additional eligible studies.

### 2.2. Study selection

Inclusion criteria were determined *a priori*: adult humans ( $\geq 18$  years old); deliberately exposed to a near-whole-genome, attenuated version of any of the following priority viruses: Ebolavirus; Lassa mammarenavirus; Nipah virus (NiV);

Rift Valley fever phlebovirus; chikungunya virus (CHIKV); or Middle East respiratory syndrome–related coronavirus (MERS-CoV).

For a successful CHIM, it is essential to confirm infection and clearance with microbiological or virological techniques [27,31]. Therefore, we excluded studies of mutations that preclude representative viral replication: chemical inactivation; irradiation; sub-unit vaccines; virus-like particles; recombinant viruses with genetic material from another virus such as vesicular stomatitis virus or chimpanzee adenovirus; and mRNA or DNA vaccines. Studies without primary data, such as editorials or systematic reviews were also excluded. COVID-19 has already been developed into a well-established CHIM [32,33] and was therefore not included in this scoping review. CEPI lists a hypothetical, unknown “Disease X” as a priority pathogen for vaccine development. An unknown disease is not amenable to human challenge so this priority pathogen group was excluded. Some strategies for the rapid development of a CHIM for a new pathogen in a pandemic scenario are discussed elsewhere and are outside the scope of this review [16,34–36]. Mpox was designated a CEPI Priority Pathogen online after completion of the scoping review protocol and was not included [8].

Two investigators (DOH and VS) independently screened titles and abstracts using Rayyan (<https://www.rayyan.ai/>) [37]. The first 25 title and abstracts were screened together as a pilot to ensure consistency. No automated tools were used. All abstracts deemed potentially eligible by either author proceeded for full text review by both authors, recorded using Microsoft Excel (Microsoft, WA, US). Discrepancies of full text studies were resolved by discussion or by a third investigator (BM).

### 2.3. Data extraction

The primary outcome was confirmation the administered viral strain could subsequently be recovered from participants. The secondary outcome was safety of the mutant viruses. Other outcomes were narratively summarised where reported, namely: author; year; institution; mutation from wild-type; study phase; dosage; sample size; comparator; adverse events (AE)/serious adverse events (SAE); follow-up length; and availability and regulatory requirements.

The full framework for data extraction is presented in [S3 File](#). This was developed iteratively with input from authors expert in CHIM development as the search developed. Data was extracted by a single-author (DOH), recorded using Microsoft Excel, and checked by a second (VS). A risk of bias assessment was conducted by a single author (DOH). We used the original Cochrane Collaboration Tool [38] for randomised studies. This tool was the most appropriate because the outcome of interest in our review (viraemia) was not the primary outcome of the studies evaluated and this tool provides a general risk of bias assessment rather than against a particular outcome. Non-randomised studies were assessed using the ROBINS-E tool [39].

### 2.4. Data synthesis

Some attenuated strains were investigated in more than one study. In those cases, the methodology and results of those studies are presented together ([Table 1](#) and [S3 File](#)). We have provided a descriptive and quantitative (where appropriate) summary for each identified attenuated strain. A background for each pathogen is also presented prior to the description of any identified attenuated strains.

## 3. Results

The literature search resulted in 13,078 studies (n=6242 for EVD, n=2517 for MERS-CoV, n=1591 for CHIKV, n=1197 for Rift Valley fever virus (RVFV), n=911 for Lassa virus (LV) and n=620 for NiV). We first removed 3653 duplicates and then, as per our protocol, removed 3427 articles found via search-terms that referenced non-human primates, with the option they could be included later if very limited human data was found (this step was not subsequently required). Thus, 5998 studies remained for title and abstract screening. Of these, 351 manuscripts were selected for full text review and nine were included for data extraction (see [Fig 1](#)). [Table 1](#) describes the characteristics of included studies and each

**Table 1. Results and characteristics of studies included after full-text review, with further detail in [S3 File](#).**

| Author & Year                             | Candidate name & Pathogen | Study Phase | Number exposed | Rate of recovery of attenuated virus | Method for detection of attenuated virus           | Adverse event incidence       | Serious adverse events | Suitable for CHIM              |
|-------------------------------------------|---------------------------|-------------|----------------|--------------------------------------|----------------------------------------------------|-------------------------------|------------------------|--------------------------------|
| McClain 1998<br><a href="#">[40]</a>      | TSI-GSD-218 CHIKV         | Phase 1     | 55             | 36.8%*                               | Amplification in cell culture                      | Overall AE rate not reported  | Nil                    | Yes                            |
| Edelman 2000<br><a href="#">[41]</a>      | TSI-GSD-218 CHIKV         | Phase 2     | 59             | Not reported                         | N/A                                                | Overall AE rates not reported | Nil                    | Yes                            |
| Hoke 2012<br><a href="#">[48]</a>         | TSI-GSD-218 CHIKV         | Phase 1     | 51             | Not reported                         | N/A                                                | Overall AE rates not reported | Nil                    | Yes                            |
| Wressnigg 2020<br><a href="#">[46]</a>    | VLA1553 CHIKV             | Phase 1     | 120            | Not reported**                       | RT-qPCR                                            | 73%                           | 0.8% (1/120)           | Yes                            |
| Schneider 2023<br><a href="#">[42]</a>    | VLA1553 CHIKV             | Phase 3     | 3082           | Not reported                         | N/A                                                | 62.5%                         | 1.5% (46/3082)         | Yes                            |
| McMahon 2024<br><a href="#">[43]</a>      | VLA1553 CHIKV             | Phase 3     | 408            | Not reported                         | N/A                                                | 72.5%                         | 1.2% (5/408)           | Yes                            |
| Pittman 2016a<br><a href="#">[45]</a>     | MP-12 RVFV                | Phase 1     | 69             | 16.3% (7/43)                         | Direct plaque assay and nucleic acid amplification | Overall AE rates not reported | Nil reported           | Yes                            |
| Pittman 2016b<br><a href="#">[47]</a>     | MP-12 RVFV                | Phase 2     | 19             | 26.3% (5/19)                         | Blind passage of plasma on Vero cells              | 89.5%                         | Nil                    | Yes                            |
| Leroux-Roels 2024<br><a href="#">[44]</a> | hRVFV-4s RVFV             | Phase 1     | 60             | 0% (0/60)                            | RT-qPCR                                            | Overall AE rate not reported  | Nil                    | No- given no recoverable virus |

AE = adverse event, CHIKV = chikungunya virus, CHIM = controlled human infection model, N/A = not applicable, RT-qPCR = quantitative reverse transcription polymerase chain reaction, RVFV = Rift Valley fever virus. \* - numerator/denominator not presented (presumed 7/19) \*\* - Wressnigg 2020 presents mean cohort genome copy equivalents only.

<https://doi.org/10.1371/journal.pntd.0013243.t001>

pathogen is described separately, with further detail in [S3 File](#). [Table 2](#) presents the pipeline of attenuated viruses across the pathogens. All attenuated viruses identified in this scoping review had been developed as part of a search for an effective live-attenuated vaccine.

Of the nine included studies, five were randomised controlled trials [\[40–44\]](#), two were randomised controlled Phase 1 trials with a non-randomised safety or confirmatory cohort [\[45,46\]](#) and two were non-randomised interventional studies [\[47,48\]](#). Five of the nine studies investigated for recovery of attenuated virus [\[40,44–47\]](#). [S4 File](#) presents risk of bias assessments for the included studies. Only one study was found to be at high risk of bias [\[45\]](#).

### 3.1. CHIKV

This alphavirus is transmitted by *Aedes* mosquitoes and can cause explosive epidemics, particularly in urban areas [\[23,60,61\]](#). At the time of writing, there is an active epidemic in La Réunion with >47,000 cases reported since August 2024 [\[62\]](#). CHIKV is endemic to several continents including Africa, Asia, the Americas and, more recently, southern Europe [\[63,64\]](#). There is international concern that climate change will increase the spread of CHIKV by expanding the habitat for its vector into previously infection-naïve populations [\[63,64\]](#). Chikungunya disease is characterised by fever,

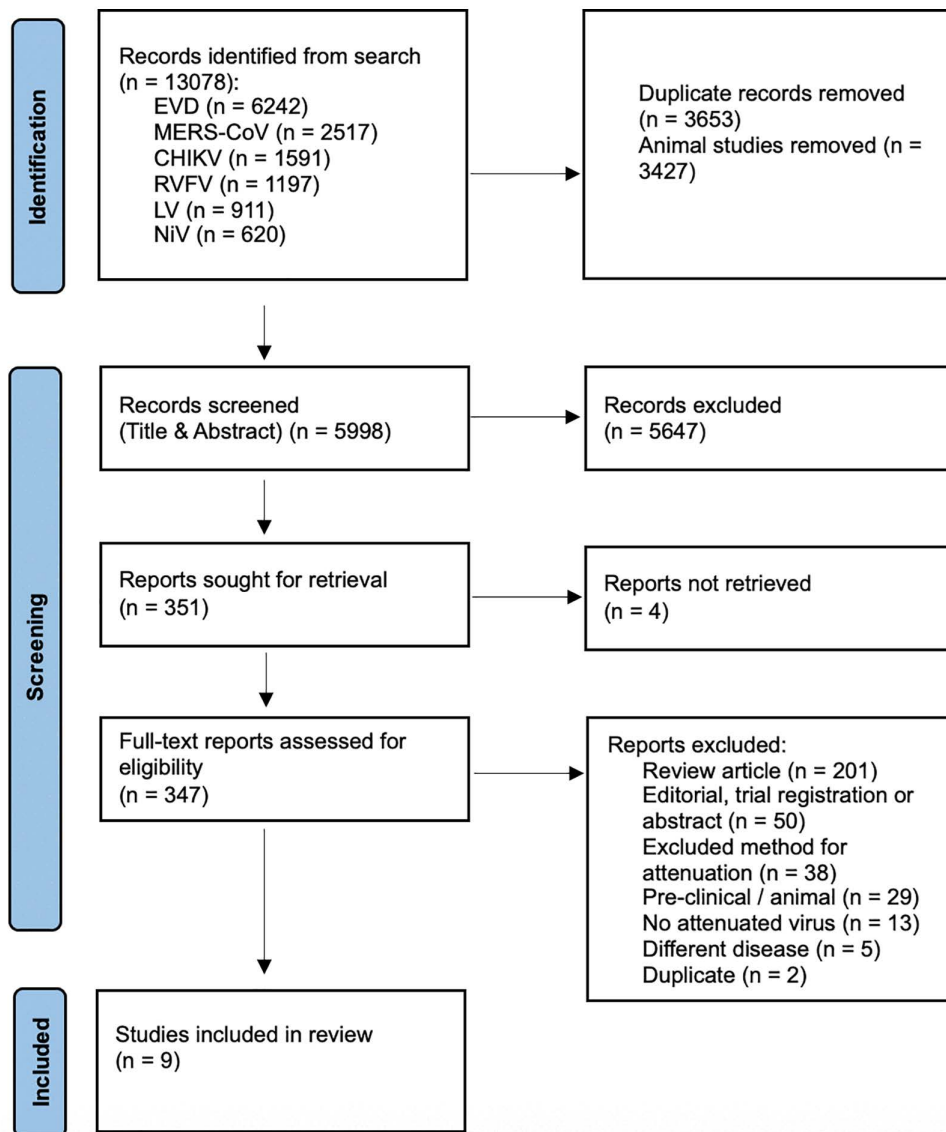

**Fig 1. PRISMA Flow Diagram for the Scoping Review process.** CHIKV=chikungunya virus, EVD=Ebola virus disease, LV=Lassa virus, MERS-CoV=Middle East respiratory syndrome-related coronavirus, NiV=Nipah virus, RVFV=Rift Valley fever virus.

<https://doi.org/10.1371/journal.pntd.0013243.g001>

malaise and arthralgia with a case-fatality rate around 0.1%, although this can be higher in older or co-morbid adults [23]. The disease is associated with a high level of long-term morbidity as it can lead to a chronic, debilitating arthritis, which accounts for a substantial global socioeconomic burden [65]. There are no licenced antiviral treatments against this infection [66]. There are two recently licensed vaccines against CHIKV: Ixchiqu, a live-attenuated vaccine using strain VLA1553 that is discussed in detail below [67]; and Vimkunya, a virus-like particle (VLP) vaccine [68,69]. There are multiple attenuated CHIKV strains that have been used in pre-clinical or animal models [70–79], although only two have proceeded to use in humans, VLA1553 and TSI-GSD-218.

**3.1.1. VLA1553.** VLA1553 (initially termed Δ5nsP3), was developed as a single-shot live-attenuated vaccine. First described by Hallengård et al [80], attenuation was achieved by deleting a large part of the gene *nsP3* encoding the



**Table 2. Pipeline of attenuated virus controlled human infection model candidates for Coalition for Epidemic Preparedness Innovations (CEPI) identified priority pathogens (excluding COVID-19, mpox and “disease X”) across the translational development pipeline, organised by strains in most advanced stage of study.**

| Pre-clinical     | Phase 1  | Phase 2   | Phase 3/ Post-marketing |
|------------------|----------|-----------|-------------------------|
| LV [49,50]       | EVD [51] | RVFV [47] | CHIKV [42,43]           |
| MERS-CoV [52–57] |          |           |                         |
| NiV [58,59]      |          |           |                         |

CHIKV = chikungunya virus, EVD = Ebola virus disease, LV = Lassa virus, MERS-CoV = Middle East respiratory syndrome-related coronavirus, NiV = Nipah virus, RVFV = Rift Valley fever virus.

<https://doi.org/10.1371/journal.pntd.0013243.t002>

non-structural replicase complex protein nsP to minimise the risk of reversion. The candidate is based on the 2004–2005 epidemic La Réunion strain, produced in Vero cells and purified by centrifugation, ultrafiltration, batch-chromatography, and sucrose gradient centrifugation. The mutated virus was shown to be genetically stable, safe and protective in a mouse model [80], and later in a non-human primate model [81].

Wressnigg et al. conducted a Phase 1 study in 120 healthy adults using a single-shot of three escalating doses of VLA1553 [46] (S3 File). Systemic solicited AEs were experienced by 52.5% (63/120) of participants and 10.8% (13/120) of participants experienced severe related adverse events. There were no adverse events of special interests (AESIs) and there was one unrelated SAE (S3 File). Following the first dose, a transient increase in viral RNA was detected in all cohorts by quantitative reverse transcription polymerase chain reaction (RT-qPCR) using a hydrolysis probe and primers specific to the CHIKV gene *nsP1*, which peaked at Day 3 and resolved by Day 14. Urinary shedding of attenuated virus was only detected at one time point in one participant. Of note, in 94 participants administered repeat immunisation 6–12 months later, attenuated virus was not detectable by RT-qPCR and only 3.2% (3/94) of participants experienced targeted systemic symptoms solicited by investigators.

The safety of the candidate was demonstrated in a large double-blind, multicentre, placebo-controlled, randomised Phase 3 trial when given to 3082 participants (of 3093 randomised) [42]. AEs were experienced by 62.5% (1926/3082) of participants who received VLA1553, with the majority headache, fatigue and myalgia, although 18.0% (554/3082) experienced arthralgia. SAEs were reported in 1.5% (46/3082) of participants exposed to VLA1553 compared to 0.8% (8/1033) of participants in the placebo arm, although only two of the SAEs were deemed related to the vaccine (one mild myalgia in a 58-year-old patient with known fibromyalgia leading to a five-day hospitalisation for investigation and one admission for presumed syndrome of inappropriate antidiuretic hormone secretion and atrial fibrillation in a 66-year-old patient following a fever on day 11). Recovery of attenuated virus from the blood of participants was not attempted in this study. A second Phase 3 study of 408 participants examining three lots of VLA1553 further confirmed the safety of this attenuated virus, although this study did also not attempt to recover attenuated virus [43]. The use of VLA1553 as a live-attenuated vaccine (licensed as Ixchiq) has been approved in Canada, the European Union and the UK and tens of thousands of doses have been administered globally [67,82–84]. However, use has recently been paused in adults aged over 65 in Canada and the UK due to concern regarding post-marketing safety reports, including three deaths, in this subpopulation [84–86]. Having initially licensed Ixchiq for use in the USA, the Food and Drug Administration has since suspended this licence for all adults due to these safety concerns [84].

**3.1.2. TSI-GSD-218.** An attenuated version of CHIKV, later termed TSI-GSD-218 and also known as CHIK 181/clone 25, was created by Levitt et al. in 1985 from a Thai strain serially passaged in primary green monkey kidney cells and later in Medical Research Council (MRC)-5 cells in an attempt to develop a live-attenuated vaccine [87]. The attenuation is only mediated by two point mutations in the E2 glycoprotein [88].

Phase 1 studies were conducted by the US Military but have been only partially published [40,48]. In the cohort of alphavirus-naïve participants a Phase 1 study [40], 36.8% (presumed 7/19) had detectable viraemia upon amplification in cell culture for 1–2 days from Day 4–8, although none could be directly plaqued from serum. The overall number of AEs is not reported although there was a low number of typical solicited AEs and the authors state that these were not significantly different from the placebo cohort. Summary data from previously unpublished Phase 1 studies are presented by Hoke et al. with no significant safety concerns reported [48].

In a Phase 2 study, 73 healthy volunteers were recruited to a randomised, placebo-controlled trial of vaccination with TSI-GSD-218 (4:1 vaccine to placebo) [41]. Related AEs were similar across both cohorts (32% [19/59] vs 29% [4/14]) with two severe related AEs and 8% (5/59) experiencing temporary arthralgia compared to 0% in the placebo arm. The levels of viraemia are not reported in this study. Our search did not identify any studies involving TSI-GSD-218 that were actively recruiting since the year 2000, reportedly due to “changes in assessment of threats to military operations” alongside “anticipated difficulties” in demonstrating efficacy [48].

### 3.2. RVFV

This bunyavirus is transmitted by multiple mosquito species between humans and ruminants [89]. The resultant RVF disease is a major One Health and economic threat as it can cause epidemics of fatal disease in both humans and live-stock [90]. RVFV is endemic to sub-Saharan Africa and the Arabian Peninsula. There is concern it could spread further due to spill-over events from imported infected herds or via the increasing global reach of its vectors [91]. RVFV causes a wide-spectrum of human disease including encephalitis, hepatitis, retinitis and viral haemorrhagic fever, fatal in around 20% of hospitalised patients [90,92,93]. There are currently no licenced vaccines or antivirals against RVFV for use in humans. There are multiple attenuated versions of RVFV in the scientific literature, often developed as a live-attenuated vaccine for animals [94–106], and based on our search, we identified two that have progressed to use in humans [44,45,47], strains MP-12 and hRVFV-4s.

**3.2.1. MP-12.** First developed in the 1980s by the US military, MP-12 is an attenuated strain of RVFV created for both human and veterinary use by performing 12 serial plaque passages of the Egyptian strain ZH548 through MRC-5 cells in the presence of 5-fluorouracil [107]. The attenuation is based on mutations in all of the S-, M- and L-segments of the virus [89], providing some protection against reversion to wild-type [102]. MP-12 has been shown to be generally safe and immunogenic in ruminants [108–111] and non-human primates [112,113], whilst also causing a low level viraemia. However, it was shown to be potentially teratogenic in early pregnancy and may cause a hepatitis in young animals [92,101].

Two Phase 1 studies of MP-12 were previously unpublished but later summarised by Pittman et al. in their Phase 1 dose escalation and route comparison study as part of the assessment of MP-12 as a live-attenuated vaccine [45]. Firstly, four participants received undiluted MP-12 ( $10^{4.4}$  plaque forming units [PFU]) as a subcutaneous (SC) injection. All four participants developed a mild-moderate transaminitis which resolved without sequelae. Attenuated virus was recovered from one participant using nucleic acid amplification. A further 22 participants were randomised to placebo or four different dilutions of MP-12 SC (S3 File). Transaminitis, raised lactate dehydrogenase and creatinine kinase (CK) are reported but the authors summarise the vaccine as “remarkably safe” [45]. In the published data of the Phase 1 study, performed in 1996 and published in 2016, 56 healthy volunteers were randomised to various doses of MP-12 either SC or intramuscular (IM) (S3 File) [45]. No SAEs and no significant solicited symptoms are reported, however there was one self-resolving Grade 4 transaminitis. Three Grade 4 rises in CK are also reported, although the authors comment that these were likely related to military exercises performed by participants. Virus could be recovered by direct plating of serum in one participant and in a further six by tissue culture amplification and *in situ* detection via Enzyme-Linked Immunosorbent Assay (ELISA) (7/43 [16.3%] exposed participants).

A Phase 2 study by the same group administered  $10^5$  PFU IM to 19 healthy volunteers [47]. Solicited AEs, including headache, fever and injection site pain, were frequent but well tolerated (S3 File). No significant related biochemical



abnormalities and no SAEs are reported. Assessment of viraemia was performed on plasma and buffy coat specimens collected daily for 14 days post exposure using both plaque assay and blind, double passage on Vero cells. No viraemia was detected by direct plaque assay in any participant. Viraemia detection using blind, double passage on Vero cells was detectable in 5/19 (26.3%) of participants (1–4 isolates per subject, between Day 4 and Day 9). There was no reversion to wild-type in recovered virus between participants. We identified no studies that administered MP-12 to humans after 2008. There are reports that MP-12 vaccine candidate was paused due to cold-chain and BioSafety Level-3 requirements; and liver toxicity concerns [114].

**3.2.2. hRVFV-4s.** hRVFV-4s is a mutant RVF virus created by splitting the glycoprotein precursor gene to produce a four-segment virus [115]. It has been demonstrated to be safe in mice [115], ruminants [116] and non-human primates [117], whilst causing no detectable viraemia. A Phase 1 study of 75 participants in a placebo-controlled (3:1), dose-escalation study of hRVFV-4s demonstrated that the attenuated virus was well tolerated with only mild-moderate solicited symptoms and no related Grade 3–4 symptoms or SAEs [44]. Importantly, no vaccine viral RNA was detected via RT-qPCR in any blood, urine, saliva or semen samples from participants at numerous timepoints (days 0, 1, 3, 7, 14, 28, and 180).

### 3.3. Ebolavirus species

Viruses within the *Filoviridae* are RNA viruses which cause viral haemorrhagic fever (VHF) with high morbidity and mortality and is transmitted person-to-person via direct contact with infected bodily fluids [118]. It has caused devastating epidemics across West and Central Africa, most notably the 2013–2016 West African epidemic which caused 11,325 deaths [119]. There are four species of the genus Ebolavirus that cause disease in humans: Sudan ebolavirus (SUDV), Bundibugyo ebolavirus, Tai Forest ebolavirus (TAFV), and Zaire ebolavirus (EBOV) [120]. The SUDV and EBOV species have historically caused most epidemics [119].

Two vaccines have been licenced in the USA or Europe: rVSVΔG-ZEBOV-GP (Ervebo) [121] and Ad26.ZEBOV + heterologous MVA-BN-Filo boost (Zabdeno/Mvabea) [120]. Only Mvabea may provide coverage against non-EBOV species as it expresses EBOV, SUDV & Marburg virus glycoproteins plus TAFV nucleoprotein [122]. There are two antiviral treatments licenced for EBOV: atoltivimab-maftivimab-odesivimab (Inmazeb) and ansuvimab (Ebanga) [123]. Attenuated whole-genome Ebola is uncommon in the pre-clinical literature [118,124–128], although one, EBOVΔVP30, has progressed to both non-human primate [129] and Phase 1 human study [51].

**3.3.1. EBOVΔVP30.** Halfmann et al. developed a mutant that lacks the viral protein (VP) 30 gene, known as EBOVΔVP30 [118]. VP30 is an essential transcription factor for EBOV and hence this virus is replication-deficient outside of Vero cells expressing VP30 *in trans*. It has been shown to be genetically stable, morphologically indistinct from wild-type and safe in a mouse model [126]. The mutant was further inactivated with hydrogen peroxide when transferred to a non-human primate model [129]. According to the trial registry, in 2019, a Japanese group enrolled 15–30 healthy human volunteers to a Phase 1 study using EBOVΔVP30 (named ‘iEvac-Z’) [51]. This study has not yet been published, although a conference abstract describes “a strong safety profile in humans” [130]. As there are no further published data to assess, the study did not meet our pre-specified inclusion criteria for this scoping review. There are press reports that state a second study was due to open in Sierra Leone in 2024 [131].

### 3.4. LV

LV is an arenavirus endemic to West Africa [132]. It causes Lassa fever, a VHF responsible for around 5000 deaths per year [133], for which there are no licenced vaccines or therapeutics. LV may be transmitted by rodents or person-to-person via infected bodily fluids [49]. We identified no example of whole-genome attenuated LV that has been administered to non-human primates or humans. There are however recent examples of live attenuated viruses created by reverse genetics and administered to guinea pigs in an attempt to create a novel live-attenuated vaccine [49,50]. The fact

that Argentine haemorrhagic fever virus, another arenavirus causing VHF, has a licenced live-attenuated vaccine in current use [134] gives further credence to the idea that a safe attenuated LV mutant may be feasible.

There is an example of an attenuated virus, ML29, rationally created by reassortment of LV and Mopeia virus (MOPV), an attenuated relative of LV, that has been administered to non-human primates [135,136]. This carries the replication machinery of MOPV and expresses major antigens of LV, however as this is genetically distinct from LV itself and only results in a low, transient viraemia, it did not meet pre-specified criteria for inclusion in our scoping review [136].

### 3.5. NiV

NiV is a henipavirus that has caused sporadic outbreaks throughout Asia. It is spread by bats, livestock or human-to-human transmission and therefore of high pandemic potential [137,138]. It can cause a lethal encephalitis with a high case-fatality rate and has no licenced therapy or vaccination [138,139]. Whilst there are attenuated whole-genome versions of NiV in a pre-clinical setting [58,59], we identified no studies that have progressed to human use.

### 3.6. MERS-CoV

MERS-CoV is a coronavirus similar to severe acute respiratory syndrome coronavirus (SARS-CoV) and COVID-19, which can cause a fatal pneumonia with a high case-fatality rate [140]. It is spread by dromedary camels or by person-to-person contact [141]. MERS-CoV is largely contained within in the Arabian Peninsula, although it has caused a large outbreak in South Korea when imported by a returning traveller [142]. There are no current licenced vaccines or antivirals against MERS-CoV [143]. Whilst there are multiple attenuated whole-genome versions of MERS-CoV in pre-clinical use [52–57], we identified no studies that have progressed to human use.

## 4. Discussion

We have conducted a rigorous scoping review to identify existing attenuated strains of six CEPI priority pathogens that have been used in humans that could potentially be progressed into novel human challenge models. We have identified four such strains across two priority pathogens, although only three strains (TSI-GSD-218 [40,41,48] and VLA1553 [42,43,46] of CHIKV and MP-12 [45,47] of RVFV) that produce the required virological response necessary for a CHIM [27]. The final identified strain, hRVFV-4s of RVFV, does not cause viraemia in pre-clinical settings [117] nor was virus detected in humans despite robust RT-qPCR testing [44]. There was insufficient published data to assess the attenuated EBOV strain EBOVΔVP30, although based on the pre-clinical data [129], it is unlikely that it would cause detectable viraemia for use as a primary endpoint within a CHIM. Three of the CEPI priority pathogens, NiV, MERS-CoV and LV, have no existing attenuated strains administered to humans.

Of the three identified strains where attenuated virus may be recovered from the host, only VLA1553 has progressed to Phase 3 testing and licensure in the form of the live-attenuated vaccine Ixchiq [42,43,67,83]. VLA1553 has been demonstrated to be tolerable and safe and appears to produce consistent detectable viral RNA with an immunological response similar to natural infection [46,83,144–146]. The use of attenuated virus raises concerns about reversion to wild-type, however to date there has been no reports of this for VLA1553 and the deletion of a large part of the gene *nsP3* renders this unlikely [80]. The lack of detectable virus and markedly reduced solicited adverse events seen following re-exposure 6–12 months later can be interpreted as a proof-of-concept that VLA1553 could be useful as a challenge agent investigating other MCMs against CHIKV, with effects on attenuated viral RNA and symptoms as outcome measures. However, the safety concerns with VLA1553 that have been identified post-licensure in older or co-morbid patients demonstrate the importance of careful participant selection in a future hypothetical CHIM [84,85]. It is also unknown if VLA1553 would be detectable if administered SC or intra-dermally, which would imitate a mosquito bite more closely. Nevertheless, VLA1553 remains a more promising candidate for development into a CHIM for CHIKV than TSI-GSD-218 given the greater clinical experience and more stable mutation (S3 File).

Typically, live-attenuated viruses are developed as early vaccine candidates and have a long history of safe use, for example, in yellow fever, smallpox and polio [147]. However, such candidates may be discontinued as potential vaccines if they are unacceptably reactogenic, even if they are safe and immunogenic. Reactogenicity is of lower concern in a human challenge agent if meticulous informed consent is obtained; symptoms are mild/moderate and participants are closely monitored. There is precedent with dengue for progressing an abandoned live-attenuated vaccine candidate (rDEN2Δ30) into a successful attenuated CHIM [25,148]. The efficacy of the TV003 vaccine that was demonstrated in the CHIM by Kirkpatrick et al. [25] was later replicated in Phase 3 field trials [149]. We postulate that this model could be imitated with VLA1553 in CHIKV to test novel therapeutics or additional vaccine candidates that may be more suitable for pregnant, older or immunocompromised patients than VLA1553. A safe CHIM for CHIKV would be an important advance due to: the limitations of animal models [150]; the lack of a universally-accepted correlate of protection [23,151]; the difficulties in conducting field tests due to unpredictable and often short-lived outbreaks [23,66]; and the lack of licenced antiviral [23,66].

Similarly, it may be possible to develop MP-12 into a CHIM for RVFV. It has been shown to be well tolerated and safe in Phase 1 and 2 studies when administered both SC and IM to around 100 healthy volunteers [45,47] and is conditionally licenced in animals [114]. However, the recovery rate of MP-12 in participants is low at 16.3–26.3%, which would necessitate a large sample size in a hypothetical CHIM [45,47], although these rates are based on techniques of direct plaque assay, nucleic acid amplification or blind passage through Vero cells. More work would be required to determine the attack rate using contemporary diagnostic assay techniques. In order to progress MP-12 into a CHIM, a method of recovering the strain by RT-qPCR would need to be developed. Whilst we identified no human studies that were actively recruiting since 2008, there is suggestion in the literature that this was still being developed as a live-attenuated vaccine in 2020 by the Sabin Vaccine Institute [102].

There are a number of other attenuated RVFV strains used in veterinary practice but none appear suitable for development into CHIM, either due to safety concerns in the case of the Smithburn strain [89] or the lack of viraemia in the Clone-13 strain [102]. There are also several so-called “next-generation” MP-12 strains in pre-clinical development, such as r2segMP12, DDVax and RVax-1 [89,101]. These are strains that have been attenuated through reverse genetics of the NSs protein, a major virulence factor, however their safety in humans or their ability to cause a viraemia is currently unknown [89] and further study would be required before incorporation into a CHIM.

During the COVID-19 pandemic, SARS-CoV-2 CHIM studies were performed [32,33] after development of a robust ethical framework [16,152]. These studies represent the first time a CHIM had been used in an active pandemic [32]. COVID CHIM studies provided unique data on the underlying pathophysiology [33], transmission of the disease and the accuracy of lateral-flow testing [32]. However, recruitment to these studies still took over a year from the initial onset of the pandemic [31], by which time vaccines had been developed and licensed using traditional (accelerated) routes. It is recognised that creating an attenuated virus may take at least a year of study during a pandemic [36], and therefore we have searched for strains that could be used in advance of an epidemic or pandemic to model the efficacy of candidate MCMs in the pipeline [153].

Our scoping review has several strengths. To our knowledge, it is the first review to systematically investigate existing attenuated viral strains of priority pathogens that could be re-purposed into a CHIM. We involved an information specialist to develop our search strategy and adhered closely to both our pre-specified protocol and recognised methodology for a scoping review [29]. In common with all scoping reviews, our findings are dependent on the quality of the included studies leading to some limitations. Whilst all individual candidate strains had at least one study reporting detectable attenuated virus in blood, only four of the nine included studies reported these rates precisely [40,44,45,47]. There was also incomplete reporting of overall adverse event rates, with five studies not reporting these data precisely [40,41,44,45,48]. Furthermore, there were notable incomplete or delayed publications on early phase work with strains TSI-GSD-218 (CHIKV) and MP-12 (RVFV) by the US military, which undermines confidence in the safety of progressing those strains into CHIM [40,45,48]. We made a pragmatic decision to focus the scoping review on six viruses on the CEPI priority pathogen list [5],

rather than the 23 viruses on the WHO “list of emerging pathogens for a potential future pandemic” [1], due to logistical capacity. However, the same methodology and data collection framework could be applied to other viruses with pandemic potential in future work.

In conclusion, there are three attenuated viral strains of two CEPI priority pathogens, CHIKV and RVFV, that have been administered to humans that cause detectable attenuated viral RNA in blood and may therefore be amenable to development into a novel CHIM. Of these, VLA1553 for CHIKV is a licenced and commercially available vaccine product and therefore suitable for immediate use in CHIM. There is a research gap for the creation of new attenuated mutants that could be utilised in CHIM for other priority pathogens, but the availability of reverse genetics systems and sound knowledge of proteins such as interferon antagonists, or codon deoptimization strategies could allow the future development of such attenuated viruses.

## Supporting information

**S1 File. PRISMA-Scr Checklist.** From: Tricco AC, Lillie E, Zarin W, O’Brien KK, Colquhoun H, Levac D, et al. PRISMA Extension for Scoping Reviews (PRISMA-ScR): Checklist and Explanation. *Ann Intern Med.* 2018;169:467–473. <https://doi.org/10.7326/M18-0850>.

(DOCX)

**S2 File. Search strategy.**

(DOCX)

**S3 File. Expanded Table of Data Extracted from all included studies.**

(DOCX)

**S4 File. Risk of Bias Assessment.**

(DOCX)

## Author contributions

**Conceptualization:** David Oliver Hamilton, Tilly Fox, Daniela M. Ferreira, Ben Morton.

**Data curation:** David Oliver Hamilton, Victoria Simpson, Vittoria Lutje.

**Formal analysis:** David Oliver Hamilton.

**Methodology:** David Oliver Hamilton, Tilly Fox, Ben Morton.

**Supervision:** Daniela M. Ferreira, Ben Morton.

**Writing – original draft:** David Oliver Hamilton, Ben Morton.

**Writing – review & editing:** Victoria Simpson, Tilly Fox, Vittoria Lutje, Alain Kohl, Daniela M. Ferreira.

## References

1. Ukoaka BM, Okesanya OJ, Daniel FM, Ahmed MM, Udam NG, Wagwula PM, et al. Updated WHO list of emerging pathogens for a potential future pandemic: Implications for public health and global preparedness. *Infez Med.* 2024;32(4):463–77. <https://doi.org/10.53854/liim-3204-5> PMID: [39660154](https://pubmed.ncbi.nlm.nih.gov/39660154/)
2. Zhao M, Lei L, Jiang Y, Tian Y, Huang Y, Yang M. Unveiling the Threat of Disease X: Preparing for the Next Global Pandemic. *J Med Virol.* 2025;97(2):e70227. <https://doi.org/10.1002/jmv.70227> PMID: [39936837](https://pubmed.ncbi.nlm.nih.gov/39936837/)
3. Gouglas D, Christodoulou M, Hatchett R. The 100 Days Mission—2022 Global Pandemic Preparedness Summit. LID - e221142 FAU - Gouglas, Dimitrios. (1080-6040 (Print)).
4. Barnsley G, Olivera Mesa D, Hogan AB, Winskill P, Torkelson AA, Walker DG, et al. Impact of the 100 days mission for vaccines on COVID-19: a mathematical modelling study. *Lancet Glob Health.* 2024;12(11):e1764–74. [https://doi.org/10.1016/S2214-109X\(24\)00286-9](https://doi.org/10.1016/S2214-109X(24)00286-9) PMID: [39424569](https://pubmed.ncbi.nlm.nih.gov/39424569/)

5. Gouglas D, Christodoulou M, Plotkin SA, Hatchett R. CEPI: Driving Progress Toward Epidemic Preparedness and Response. *Epidemiol Rev*. 2019;41(1):28–33. <https://doi.org/10.1093/epirev/mxz012> PMID: 31673694
6. Mehand MS, Al-Shorbaji F, Millett P, Murgue B. The WHO R&D Blueprint: 2018 review of emerging infectious diseases requiring urgent research and development efforts. *Antiviral Res*. 2018;159:63–7. <https://doi.org/10.1016/j.antiviral.2018.09.009> PMID: 30261226
7. Salmanton-García J, Wipfler P, Leckler J, Nauckler P, Mallon PW, Bruijning-Verhagen PCJL, et al. Predicting the next pandemic: VACCCELER-ATE ranking of the WorldHealth Organization's Blueprint forAction toPreventEpidemics. *Travel Med Infect Dis*. 2024;57:102676. <https://doi.org/10.1016/j.tmaid.2023.102676> PMID: 38061408
8. Coalition for Epidemic Preparedness Innovations. Coalition for Epidemic Preparedness Innovations: Priority Pathogens. Available from: <https://cepi.net/priority-pathogens>
9. Corbett KS, Edwards DK, Leist SR, Abiona OM, Boyoglu-Barnum S, Gillespie RA, et al. SARS-CoV-2 mRNA vaccine design enabled by prototype pathogen preparedness. *Nature*. 2020;586(7830):567–71. <https://doi.org/10.1038/s41586-020-2622-0> PMID: 32756549
10. Krammer F. SARS-CoV-2 vaccines in development. *Nature*. 2020;586(7830):516–27. <https://doi.org/10.1038/s41586-020-2798-3> PMID: 32967006
11. MusiCC. Mucosal Immunity in Human Coronavirus Challenge (MusiCC) - Advancing the development of next-generation COVID-19 vaccines [cited 2025 28th February]. Available from: <https://www.musicc.org/>
12. Pollard AJ, Savulescu J, Oxford J, Hill AV, Levine MM, Lewis DJ, et al. Human microbial challenge: the ultimate animal model. *Lancet Infect Dis*. 2012;12(12):903–5. [https://doi.org/10.1016/S1473-3099\(12\)70292-X](https://doi.org/10.1016/S1473-3099(12)70292-X) PMID: 23174372
13. Habibi MS, Chiu C. Controlled human infection with RSV: The opportunities of experimental challenge. *Vaccine*. 2017;35(3):489–95. <https://doi.org/10.1016/j.vaccine.2016.08.086> PMID: 27889256
14. Choy RKM, Bourgeois AL, Ockenhouse CF, Walker RI, Sheets RL, Flores J. Controlled human infection models to accelerate vaccine development. *Clin Microbiol Rev*. 2022;35(3):e0000821.
15. Adams-Phipps J, Toomey D, Więcek W, Schmit V, Wilkinson J, Scholl K, et al. A Systematic Review of Human Challenge Trials, Designs, and Safety. *Clin Infect Dis*. 2023;76(4):609–19. <https://doi.org/10.1093/cid/ciac820> PMID: 36219704
16. Shah SK, Miller FG, Darton TC, Duenas D, Emerson C, Lynch HF, et al. Ethics of controlled human infection to address COVID-19. *Science*. 2020;368(6493):832–4. <https://doi.org/10.1126/science.abc1076> PMID: 32381590
17. Mosley JF, Smith LL, Brantley P, Locke D, Como M. Vaxchora: The First FDA-Approved Cholera Vaccination in the United States. *P T*. 2017;42(10):638–40.
18. Burki T. Typhoid conjugate vaccine gets WHO prequalification. *Lancet Infect Dis*. 2018;18(3):258. [https://doi.org/10.1016/S1473-3099\(18\)30087-2](https://doi.org/10.1016/S1473-3099(18)30087-2) PMID: 29485093
19. Jin C, Gibani MM, Moore M, Juel HB, Jones E, Meiring J, et al. Efficacy and immunogenicity of a Vi-tetanus toxoid conjugate vaccine in the prevention of typhoid fever using a controlled human infection model of Salmonella Typhi: a randomised controlled, phase 2b trial. *Lancet*. 2017;390(10111):2472–80. [https://doi.org/10.1016/S0140-6736\(17\)32149-9](https://doi.org/10.1016/S0140-6736(17)32149-9) PMID: 28965718
20. World Health Organisation. Human challenge trials for vaccine development: regulatory considerations, Annex 10, TRS No 1004. 2017.
21. World Health Organisation. World Health Organisation guidance on the ethical conduct of controlled human infection studies 2021 [6th March 2024]. Available from: <https://iris.who.int/bitstream/handle/10665/351018/9789240037816-eng.pdf?sequence=1>
22. Williams BMJ, Wilkinson D, Savulescu J. Ethical Framework: The ethics of controlled human infection model studies for mitigating pandemic risks 2023 . Available from: <https://ukpandemicethics.org/library/ethical-framework-the-ethics-of-controlled-human-infection-model-studies-for-mitigating-pandemic-risks/>
23. Flandes X, Hansen CA, Palani S, Abbas K, Bennett C, Caro WP, et al. Vaccine value profile for Chikungunya. *Vaccine*. 2024;42(19 Suppl 1):S9–24. <https://doi.org/10.1016/j.vaccine.2023.07.069> PMID: 38407992
24. Kalil JA, Halperin SA, Langley JM. Human challenge studies: a review of adequacy of reporting methods and results. *Future Microbiol*. 2012;7(4):481–95. <https://doi.org/10.2217/fmb.12.15> PMID: 22439725
25. Kirkpatrick BD, Whitehead SS, Pierce KK, Tibery CM, Grier PL, Hynes NA, et al. The live attenuated dengue vaccine TV003 elicits complete protection against dengue in a human challenge model. *Sci Transl Med*. 2016;8(330):330ra36. <https://doi.org/10.1126/scitranslmed.aaf1517> PMID: 27089205
26. Waickman AT, Newell K, Lu JQ, Fang H, Waldran M, Gebo C. Low-dose dengue virus 3 human challenge model: a phase 1 open-label study. *Nat Microbiol*. 2024.
27. Gordon SB, Sichone S, Chirwa AE, Hazenberg P, Kafuko Z, Ferreira DM, et al. Practical considerations for a TB controlled human infection model (TB-CHIM); the case for TB-CHIM in Africa, a systematic review of the literature and report of 2 workshop discussions in UK and Malawi. *Wellcome Open Res*. 2023;8:71. <https://doi.org/10.12688/wellcomeopenres.18767.2> PMID: 37007907
28. Jochems SP, Marcon F, Carniel BF, Holloway M, Mitsi E, Smith E, et al. Inflammation induced by influenza virus impairs human innate immune control of pneumococcus. *Nat Immunol*. 2018;19(12):1299–308. <https://doi.org/10.1038/s41590-018-0231-y> PMID: 30374129
29. Aromataris ELC, Porritt K, Pilla B, Jordan Z. JBI Manual for Evidence Synthesis . Available from: <https://jbi-global-wiki.refined.site/space/MANUAL/355599484/External+Methodological+Guidance>



30. Tricco AC, Lillie E, Zarin W, O'Brien KK, Colquhoun H, Levac D, et al. PRISMA Extension for Scoping Reviews (PRISMA-ScR): Checklist and Explanation. *Ann Intern Med*. 2018;169(7):467–73. <https://doi.org/10.7326/M18-0850> PMID: 30178033
31. Morrison H, Jackson S, McShane H. Controlled human infection models in COVID-19 and tuberculosis: current progress and future challenges. *Front Immunol*. 2023;14:1211388. <https://doi.org/10.3389/fimmu.2023.1211388> PMID: 37304270
32. Killingley B, Mann AJ, Kalinova M, Boyers A, Goonawardane N, Zhou J, et al. Safety, tolerability and viral kinetics during SARS-CoV-2 human challenge in young adults. *Nat Med*. 2022;28(5):1031–41. <https://doi.org/10.1038/s41591-022-01780-9> PMID: 35361992
33. Lindeboom RG, Worlock KB, Dratva LM, Yoshida M, Scobie D, Wagstaffe HR, et al. Human SARS-CoV-2 challenge uncovers local and systemic response dynamics. *Nature*. 2024;631(8019):189–98. <https://doi.org/10.1038/s41586-024-07575-x> PMID: 38898278
34. Levine MM, Abdullah S, Arabi YM, Darko DM, Durbin AP, Estrada V, et al. Viewpoint of a WHO Advisory Group Tasked to Consider Establishing a Closely-monitored Challenge Model of Coronavirus Disease 2019 (COVID-19) in Healthy Volunteers. *Clin Infect Dis*. 2021;72(11):2035–41. <https://doi.org/10.1093/cid/ciaa1290> PMID: 32857836
35. Barnes MVC, Mandla A, Smith E, Maskuniitty M, Openshaw PJM, HIC-Vac meeting contributors. Human infection challenge in the pandemic era and beyond, HIC-Vac annual meeting report, 2022. *Immunother Adv*. 2023;3(1):ltad024. <https://doi.org/10.1093/immadv/ltad024> PMID: 38020312
36. Deming ME, Michael NL, Robb M, Cohen MS, Neuzil KM. Accelerating Development of SARS-CoV-2 Vaccines - The Role for Controlled Human Infection Models. *N Engl J Med*. 2020;383(10):e63. <https://doi.org/10.1056/NEJMp2020076> PMID: 32610006
37. Ouzzani M, Hammady H, Fedorowicz Z, Elmagarmid A. Rayyan-a web and mobile app for systematic reviews. *Syst Rev*. 2016;5(1):210. <https://doi.org/10.1186/s13643-016-0384-4> PMID: 27919275
38. Higgins JPT, Altman DG, Gøtzsche PC, Jüni P, Moher D, Oxman AD, et al. The Cochrane Collaboration's tool for assessing risk of bias in randomised trials. *BMJ*. 2011;343:d5928. <https://doi.org/10.1136/bmj.d5928> PMID: 22008217
39. Higgins JPT, Morgan RL, Rooney AA, Taylor KW, Thayer KA, Silva RA, et al. A tool to assess risk of bias in non-randomized follow-up studies of exposure effects (ROBINS-E). *Environ Int*. 2024;186:108602. <https://doi.org/10.1016/j.envint.2024.108602> PMID: 38555664
40. McClain DJ, Pittman PR, Ramsburg HH, Nelson GO, Rossi CA, Mangiafico JA, et al. Immunologic interference from sequential administration of live attenuated alphavirus vaccines. *J Infect Dis*. 1998;177(3):634–41. <https://doi.org/10.1086/514240> PMID: 9498442
41. Edelman R, Tacket CO, Wasserman SS, Bodison SA, Perry JG, Mangiafico JA. Phase II safety and immunogenicity study of live chikungunya virus vaccine TSI-GSD-218. *Journal of Infectious Diseases*. 2000;1(6):681–5.
42. Schneider M, Narciso-Abraham M, Hadl S, McMahon R, Toepfer S, Fuchs U, et al. Safety and immunogenicity of a single-shot live-attenuated chikungunya vaccine: a double-blind, multicentre, randomised, placebo-controlled, phase 3 trial. *Lancet*. 2023;401(10394):2138–47. [https://doi.org/10.1016/S0140-6736\(23\)00641-4](https://doi.org/10.1016/S0140-6736(23)00641-4) PMID: 37321235
43. McMahon R, Fuchs U, Schneider M, Hadl S, Hochreiter R, Bitzer A. A randomized, double-blinded phase 3 study to demonstrate lot-to-lot consistency and to confirm immunogenicity and safety of the live-attenuated chikungunya virus vaccine candidate VLA1553 in healthy adults. 2024;1(2).
44. Leroux-Roels I, Prajeeth CK, Aregay A, Nair N, Rimmelzwaan GF, Osterhaus ADME, et al. Safety and immunogenicity of the live-attenuated hRVFV-4s vaccine against Rift Valley fever in healthy adults: a dose-escalation, placebo-controlled, first-in-human, phase 1 randomised clinical trial. *Lancet Infect Dis*. 2024;24(11):1245–53. [https://doi.org/10.1016/S1473-3099\(24\)00375-X](https://doi.org/10.1016/S1473-3099(24)00375-X) PMID: 39068957
45. Pittman PR, McClain D, Quinn X, Coonan KM, Mangiafico J, Makuch RS, et al. Safety and immunogenicity of a mutagenized, live attenuated Rift Valley fever vaccine, MP-12, in a Phase 1 dose escalation and route comparison study in humans. *Vaccine*. 2016;34(4):424–9. <https://doi.org/10.1016/j.vaccine.2015.12.030> PMID: 26718688
46. Wressnigg N, Hochreiter R, Zoihs O, Fritzer A, Bezay N, Klingler A. Single-shot live-attenuated chikungunya vaccine in healthy adults: a phase 1, randomised controlled trial. *The Lancet Infectious Diseases*. 2020;1(10):1193–203.
47. Pittman PR, Norris SL, Brown ES, Ranadive MV, Schibly BA, Bettinger GE, et al. Rift Valley fever MP-12 vaccine Phase 2 clinical trial: Safety, immunogenicity, and genetic characterization of virus isolates. *Vaccine*. 2016;34(4):523–30. <https://doi.org/10.1016/j.vaccine.2015.11.078> PMID: 26706271
48. Hoke CH, Pace-Templeton J, Pittman P, Malinoski FJ, Gibbs P, Ulderich T. US Military contributions to the global response to pandemic chikungunya. 2012;1(47):6713–20.
49. Carey BD, Yu S, Geiger J, Ye C, Huzella LM, Reeder RJ, et al. A Lassa virus live attenuated vaccine candidate that is safe and efficacious in guinea pigs. *NPJ Vaccines*. 2024;9(1):220. <https://doi.org/10.1038/s41541-024-01012-w> PMID: 39551823
50. Cai Y, Iwasaki M, Motooka D, Liu DX, Yu S, Cooper K. A Lassa Virus Live-Attenuated Vaccine Candidate Based on Rearrangement of the Inter-genic Region. *mBio*. 2020;11(2):24.
51. Japan Registry of Clinical Trials. Evaluation of efficacy and safety of Ebola vaccine iEvac-Z in human. In: Kawaoka Yoshihiro Approval 01/01/ethics@m.u-tokyo.ac.jp The University of Tokyo CRRBemu-taj, editor. 2019.
52. Almazán F, DeDiego ML, Sola I, Zuñiga S, Nieto-Torres JL, Marquez-Jurado S, et al. Engineering a replication-competent, propagation-defective Middle East respiratory syndrome coronavirus as a vaccine candidate. *mBio*. 2013;4(5):e00650-13. <https://doi.org/10.1128/mBio.00650-13> PMID: 24023385
53. Gutiérrez-Álvarez J, Honrubia JM, Fernández-Delgado R, Wang L, Castaño-Rodríguez C, Zúñiga S. Genetically engineered live-attenuated Middle East respiratory syndrome coronavirus viruses confer full protection against lethal infection. *mBio*. 2021;12(2).

54. Menachery VD, Gralinski LE, Mitchell HD, Dinno KH, Leist SR, Yount BL, et al. Middle East respiratory syndrome coronavirus nonstructural protein 16 is necessary for interferon resistance and viral pathogenesis. *mSphere*. 2017;2(6).
55. Scobey T, Yount BL, Sims AC, Donaldson EF, Agnihothram SS, Menachery VD, et al. Reverse genetics with a full-length infectious cDNA of the Middle East respiratory syndrome coronavirus. *Proc Natl Acad Sci U S A*. 2013;110(40):16157–62. <https://doi.org/10.1073/pnas.1311542110> PMID: [24043791](https://pubmed.ncbi.nlm.nih.gov/24043791/)
56. Myeni SK, Bredenbeek PJ, Knaap RCM, Dalebout TJ, Morales ST, Sidorov IA, et al. Engineering potent live attenuated coronavirus vaccines by targeted inactivation of the immune evasive viral deubiquitinase. *Nat Commun*. 2023;14(1):1141. <https://doi.org/10.1038/s41467-023-36754-z> PMID: [36854765](https://pubmed.ncbi.nlm.nih.gov/36854765/)
57. Seo H, Jang Y. Cold-adapted live attenuated MERS-CoV vaccine strain remains attenuated in mice after multiple passages in Vero cells at 37 °C. *Arch Microbiol*. 2024;206(10):393.
58. Satterfield BA, Cross RW, Fenton KA, Agans KN, Basler CF, Geisbert TW, et al. The immunomodulating V and W proteins of Nipah virus determine disease course. *Nat Commun*. 2015;6:7483. <https://doi.org/10.1038/ncomms8483> PMID: [26105519](https://pubmed.ncbi.nlm.nih.gov/26105519/)
59. Yoneda M, Guillaume V, Sato H, Fujita K, Georges-Courbot M-C, Ikeda F, et al. The nonstructural proteins of Nipah virus play a key role in pathogenicity in experimentally infected animals. *PLoS One*. 2010;5(9):e12709. <https://doi.org/10.1371/journal.pone.0012709> PMID: [20856799](https://pubmed.ncbi.nlm.nih.gov/20856799/)
60. Borgherini G, Poubeau P, Staikowsky F, Lory M, Le Moullec N, Becquart JP, et al. Outbreak of chikungunya on Reunion Island: early clinical and laboratory features in 157 adult patients. *Clin Infect Dis*. 2007;44(11):1401–7. <https://doi.org/10.1086/517537> PMID: [17479933](https://pubmed.ncbi.nlm.nih.gov/17479933/)
61. Argibay HD, Cardoso CW, de Souza WM, Souza RL, Pellizzaro M, Cunha GM, et al. High-resolution spatiotemporal analysis of chikungunya epidemics between 2019 and 2020 in Salvador, Brazil: a municipality-level transmission dynamics study. *Lancet Reg Health Am*. 2025;43:101003. <https://doi.org/10.1016/j.lana.2025.101003> PMID: [39925861](https://pubmed.ncbi.nlm.nih.gov/39925861/)
62. World Health Organisation. Chikungunya - La Réunion and Mayotte 2025. Available from: <https://www.who.int/emergencies/disease-outbreak-news/item/2025-DON567>
63. Silva LA, Dermody TS. Chikungunya virus: epidemiology, replication, disease mechanisms, and prospective intervention strategies. *J Clin Invest*. 2017;127(3):737–49. <https://doi.org/10.1172/JCI84417> PMID: [28248203](https://pubmed.ncbi.nlm.nih.gov/28248203/)
64. Logiudice J, Alberti M, Ciccarone A, Rossi B, Tiecco G, De Francesco MA, et al. Introduction of Vector-Borne Infections in Europe: Emerging and Re-Emerging Viral Pathogens with Potential Impact on One Health. *Pathogens*. 2025;14(1):63. <https://doi.org/10.3390/pathogens14010063> PMID: [39861024](https://pubmed.ncbi.nlm.nih.gov/39861024/)
65. de Roo AM, Vondeling GT, Boer M, Murray K, Postma MJ. The global health and economic burden of chikungunya from 2011 to 2020: a model-driven analysis on the impact of an emerging vector-borne disease. *BMJ Glob Health*. 2024;9(12):e016648. <https://doi.org/10.1136/bmjgh-2024-016648> PMID: [39627007](https://pubmed.ncbi.nlm.nih.gov/39627007/)
66. McMahon R, Toepfer S, Sattler N, Schneider M, Narciso-Abraham M, Hadl S, et al. Antibody persistence and safety of a live-attenuated chikungunya virus vaccine up to 2 years after single-dose administration in adults in the USA: a single-arm, multicentre, phase 3b study. *Lancet Infect Dis*. 2024;24(12):1383–92. [https://doi.org/10.1016/S1473-3099\(24\)00357-8](https://doi.org/10.1016/S1473-3099(24)00357-8) PMID: [39146946](https://pubmed.ncbi.nlm.nih.gov/39146946/)
67. Chen LH, Fritzer A, Hochreiter R, Dubischar K, Meyer S. From bench to clinic: the development of VLA1553/IXCHIQ, a live-attenuated chikungunya vaccine. *J Travel Med*. 2024;31(7):taae123. <https://doi.org/10.1093/jtm/taae123> PMID: [39255380](https://pubmed.ncbi.nlm.nih.gov/39255380/)
68. Richardson JS, Anderson D, Mendy J, Muhammad S, Tindale L, Loreth T, et al. 2888. Safety and Immunogenicity of an Adjuvanted Chikungunya Virus (CHIKV) Virus-like Particle (VLP) Based Vaccine in Two Pivotal Phase 3 Trials, ≥12 Years of Age. *LID - ofad500.2471*. (2328-8957 (Electronic)).
69. Contagion Editorial Team. FDA Approves Bavarian Nordic's Chikungunya Vaccine or Those 12 and Older 2025. Available from: <https://www.contagionlive.com/view/fda-approves-bavarian-nordic-s-chikungunya-vaccine-or-those-12-and-older>
70. Chan Y-H, Teo T-H, Utt A, Tan JJ, Amrun SN, Abu Bakar F, et al. Mutating chikungunya virus non-structural protein produces potent live-attenuated vaccine candidate. *EMBO Mol Med*. 2019;11(6):e10092. <https://doi.org/10.15252/emmm.201810092> PMID: [31015278](https://pubmed.ncbi.nlm.nih.gov/31015278/)
71. Piper A, Ribeiro M, Smith KM, Briggs CM, Huitt E, Nanda K. Chikungunya virus host range E2 transmembrane deletion mutants induce protective immunity against challenge in C57BL/6J mice. *PLoS One*. 2013;1(12):6748–57.
72. Gardner CL, Hritz J, Sun C, Vanlandingham DL, Song TY, Ghedin E. Deliberate attenuation of chikungunya virus by adaptation to heparan sulfate-dependent infectivity: a model for rational arboviral vaccine design. *PLOS Neglected Tropical Diseases*. 2014;1(2):e2719.
73. Carrau L, Rezelj VV, Noval MG, Levi LI, Megrian D, Blanc H, et al. Chikungunya Virus Vaccine Candidates with Decreased Mutational Robustness Are Attenuated In Vivo and Have Compromised Transmissibility. *J Virol*. 2019;93(18):e00775-19. <https://doi.org/10.1128/JVI.00775-19> PMID: [31270226](https://pubmed.ncbi.nlm.nih.gov/31270226/)
74. Abeyratne E, Freitas JR, Zaid A, Mahalingam S, Taylor A. Attenuation and Stability of CHIKV-NoLS, a Live-Attenuated Chikungunya Virus Vaccine Candidate. *Vaccines (Basel)*. 2018;7(1):2. <https://doi.org/10.3390/vaccines7010002> PMID: [30583514](https://pubmed.ncbi.nlm.nih.gov/30583514/)
75. Zhang Y-N, Deng C-L, Li J-Q, Li N, Zhang Q-Y, Ye H-Q, et al. Infectious Chikungunya Virus (CHIKV) with a Complete Capsid Deletion: a New Approach for a CHIKV Vaccine. *J Virol*. 2019;93(15):e00504-19. <https://doi.org/10.1128/JVI.00504-19> PMID: [31092567](https://pubmed.ncbi.nlm.nih.gov/31092567/)
76. Nair SR, Abraham R, Sreekumar E. Generation of a Live-Attenuated Strain of Chikungunya Virus from an Indian Isolate for Vaccine Development. *Vaccines (Basel)*. 2022;10(11):1939. <https://doi.org/10.3390/vaccines10111939> PMID: [36423034](https://pubmed.ncbi.nlm.nih.gov/36423034/)

77. Plante KS, Rossi SL, Bergren NA, Seymour RL, Weaver SC. Extended preclinical safety, efficacy and stability testing of a live-attenuated chikungunya vaccine candidate. *PLoS Negl Trop Dis*. 2015;1(9):e0004007.
78. Tretyakova I, Joh J, Gearon M, Kraenzle J, Goedeker S, Pignataro A, et al. Live-attenuated CHIKV vaccine with rearranged genome replicates in vitro and induces immune response in mice. *PLoS Negl Trop Dis*. 2024;18(4):e0012120. <https://doi.org/10.1371/journal.pntd.0012120> PMID: 38648230
79. Chamberlain J, Dowall SD, Smith J, Pearson G, Graham V, Raynes J, et al. Attenuation of Chikungunya Virus by a Single Amino Acid Substitution in the nsP1 Component of a Non-Structural Polyprotein. *Viruses*. 2025;17(2):281. <https://doi.org/10.3390/v17020281> PMID: 40007036
80. Hallengård D, Kakoulidou M, Lulla A, Kümmerer BM, Johansson DX, Mutso M, et al. Novel attenuated Chikungunya vaccine candidates elicit protective immunity in C57BL/6 mice. *J Virol*. 2014;88(5):2858–66. <https://doi.org/10.1128/JVI.03453-13> PMID: 24371047
81. Roques P, Ljungberg K, Kummerer BM, Gosse L, Dereuddre-Bosquet N, Tchitchek N. Attenuated and vectored vaccines protect nonhuman primates against Chikungunya virus. *PLOS Neglected Tropical Diseases*. 2017;1(6):e83527.
82. Medicines and Healthcare products Regulatory Agency. Medicines and Healthcare products Regulatory Agency: IXCHIQ vaccine approved to protect adults against Chikungunya 2025. Available from: <https://www.gov.uk/government/news/ixchiq-vaccine-approved-to-protect-adults-against-chikungunya>
83. Weber WC, Streblow DN, Coffey LL. Chikungunya Virus Vaccines: A Review of IXCHIQ and PXVX0317 from Pre-Clinical Evaluation to Licensure. *BioDrugs*. 2024;38(6):727–42. <https://doi.org/10.1007/s40259-024-00677-y> PMID: 39292392
84. The Lancet Infectious Diseases. More data needed on the FDA's decision to suspend Ixchiq. *Lancet Infect Dis*. 2025;25(10):1055. [https://doi.org/10.1016/S1473-3099\(25\)00552-3](https://doi.org/10.1016/S1473-3099(25)00552-3) PMID: 40946716
85. Food and Drug Administration. FDA and CDC Recommend Pause in Use of Ixchiq (Chikungunya Vaccine, Live) in Individuals 60 Years of Age and Older While Postmarketing Safety Reports are Investigated 2025. Available from: <https://www.fda.gov/vaccines-blood-biologics/safety-availability-biologics/fda-and-cdc-recommend-pause-use-ixchiq-chikungunya-vaccine-live-individuals-60-years-age-and-older>
86. Mosnier E, Jaffar-Bandjee MC, Cally R, Dahmane L, Frumence E, Luong Nguyen LB. Fatal adverse event after VLA1553 chikungunya vaccination in an elderly patient: a case report from Reunion Island. *Open Forum Infect Dis*. 2025;12(9):ofaf550.
87. Levitt NH, Ramsburg HH, Hasty SE, Repik PM, Cole FE, Lupton HW. Development of an attenuated strain of chikungunya virus for use in vaccine production. *Journal Title Abbreviation*. 1986;1(3):157–62.
88. Gorchakov R, Wang E, Leal G, Forrester NL, Plante K, Rossi SL, et al. Attenuation of Chikungunya virus vaccine strain 181/clone 25 is determined by two amino acid substitutions in the E2 envelope glycoprotein. *J Virol*. 2012;86(11):6084–96. <https://doi.org/10.1128/JVI.06449-11> PMID: 22457519
89. Alkan C, Jurado-Cobena E, Ikegami T. Advancements in Rift Valley fever vaccines: a historical overview and prospects for next generation candidates. *NPJ Vaccines*. 2023;8(1):171. <https://doi.org/10.1038/s41541-023-00769-w> PMID: 37925544
90. Wright D, Kortekaas J, Bowden TA, Warimwe GM. Rift Valley fever: biology and epidemiology. *J Gen Virol*. 2019;100(8):1187–99. <https://doi.org/10.1099/jgv.0.001296> PMID: 31310198
91. Petrova V, Kristiansen P, Norheim G, Yimer SA. Rift valley fever: diagnostic challenges and investment needs for vaccine development. *BMJ Glob Health*. 2020;5(8):e002694. <https://doi.org/10.1136/bmjgh-2020-002694> PMID: 32816810
92. Ikegami T. Rift Valley fever vaccines: an overview of the safety and efficacy of the live-attenuated MP-12 vaccine candidate. *Expert Rev Vaccines*. 2017;16(6):601–11. <https://doi.org/10.1080/14760584.2017.1321482> PMID: 28425834
93. Anywaine Z, Lule SA, Hansen C, Warimwe G, Elliott A. Clinical manifestations of Rift Valley fever in humans: Systematic review and meta-analysis. *PLoS Negl Trop Dis*. 2022;16(3):e0010233. <https://doi.org/10.1371/journal.pntd.0010233> PMID: 35333856
94. Smithburn KC. Rift Valley fever; the neurotropic adaptation of the virus and the experimental use of this modified virus as a vaccine. *Br J Exp Pathol*. 1949;30(1):1–16. PMID: 18128091
95. Ayers VB, Huang Y-JS, Dunlop JI, Kohl A, Brennan B, Higgs S, et al. Immunogenicity of a Candidate Live Attenuated Vaccine for Rift Valley Fever Virus with a Two-Segmented Genome. *Viral Immunol*. 2023;36(1):33–40. <https://doi.org/10.1089/vim.2022.0104> PMID: 36399689
96. Kortekaas J, Oreshkova N, van Keulen L, Kant J, Bosch BJ, Bouloy M, et al. Comparative efficacy of two next-generation Rift Valley fever vaccines. *Vaccine*. 2014;32(39):4901–8. <https://doi.org/10.1016/j.vaccine.2014.07.037> PMID: 25050973
97. Murakami S, Terasaki K, Makino S. Generation of a Single-Cycle Replicable Rift Valley Fever Vaccine. *Methods Mol Biol*. 2016;1403:187–206. [https://doi.org/10.1007/978-1-4939-3387-7\\_9](https://doi.org/10.1007/978-1-4939-3387-7_9) PMID: 27076131
98. Ly HJ, Nishiyama S, Lokugamage N, Smith JK, Zhang L, Perez D, et al. Attenuation and protective efficacy of Rift Valley fever phlebovirus rMP12-GM50 strain. *Vaccine*. 2017;35(48 Pt B):6634–42. <https://doi.org/10.1016/j.vaccine.2017.10.036> PMID: 29061350
99. Muller R, Saluzzo JF, Lopez N, Dreier T, Turell M, Smith J, et al. Characterization of clone 13, a naturally attenuated avirulent isolate of Rift Valley fever virus, which is altered in the small segment. *Am J Trop Med Hyg*. 1995;53(4):405–11. <https://doi.org/10.4269/ajtmh.1995.53.405> PMID: 7485695
100. Moethloa B, Tjale M, Pretorius A, Hayeshi R, Grobler A, Mokoena NB. Rift Valley Fever vaccine strategies: Enhanced stability of RVF Clone 13. *Vaccine*. 2023;41(5):1050–8. <https://doi.org/10.1016/j.vaccine.2022.12.056> PMID: 36593173
101. Kitandwe PK, McKay PF, Kaleebu P, Shattock RJ. An Overview of Rift Valley Fever Vaccine Development Strategies. *Vaccines (Basel)*. 2022;10(11):1794. <https://doi.org/10.3390/vaccines10111794> PMID: 36366303

102. Monath TP, Kortekaas J, Watts DM, Christofferson RC, Desiree LaBeaud A, Gowen B, et al. Theoretical risk of genetic reassortment should not impede development of live, attenuated Rift Valley fever (RVF) vaccines commentary on the draft WHO RVF Target Product Profile. *Vaccine X*. 2020;5:100060. <https://doi.org/10.1016/j.jvacx.2020.100060> PMID: 32337506
103. Bird BH, Maartens LH, Campbell S, Erasmus BJ, Erickson BR, Dodd KA, et al. Rift Valley fever virus vaccine lacking the NSs and NSm genes is safe, nonteratogenic, and confers protection from viremia, pyrexia, and abortion following challenge in adult and pregnant sheep. *J Virol*. 2011;85(24):12901–9. <https://doi.org/10.1128/JVI.06046-11> PMID: 21976656
104. Borrego B, Alonso C, Moreno S, de la Losa N, Sánchez-Cordón PJ, Brun A. The Rift Valley fever (RVF) vaccine candidate 40Fp8 shows an extreme attenuation in IFNARKO mice following intranasal inoculation. *PLoS Negl Trop Dis*. 2024;18(8):e0012011. <https://doi.org/10.1371/journal.pntd.0012011> PMID: 39159263
105. Alkan C, Jurado-Cobena E, Ikegami T. Distinct Pathological Changes in Prewaning Mice Infected with Live-Attenuated Rift Valley Fever Virus Strains. *Viruses*. 2024;16(7):999. <https://doi.org/10.3390/v16070999> PMID: 39066162
106. Ikegami T, Jurado-Cobena E, Alkan C, Smith JK, Zhang L, Kalveram B, et al. Evaluations of rationally designed rift valley fever vaccine candidate RVax-1 in mosquito and rodent models. *NPJ Vaccines*. 2022;7(1):109. <https://doi.org/10.1038/s41541-022-00536-3> PMID: 36131104
107. Caplen H, Peters CJ, Bishop DH. Mutagen-directed attenuation of Rift Valley fever virus as a method for vaccine development. *J Gen Virol*. 1985;66 ( Pt 10):2271–7. <https://doi.org/10.1099/0022-1317-66-10-2271> PMID: 4045430
108. Morrill JC, Carpenter L, Taylor D, Ramsburg HH, Quance J, Peters CJ. Further evaluation of a mutagen-attenuated Rift Valley fever vaccine in sheep. *Vaccine*. 1991;9(1):35–41. [https://doi.org/10.1016/0264-410x\(91\)90314-v](https://doi.org/10.1016/0264-410x(91)90314-v) PMID: 2008798
109. Morrill JC, Jennings GB, Caplen H, Turell MJ, Johnson AJ, Peters CJ. Pathogenicity and immunogenicity of a mutagen-attenuated Rift Valley fever virus immunogen in pregnant ewes. *Am J Vet Res*. 1987;48(7):1042–7. <https://doi.org/10.2460/ajvr.1987.48.07.1042> PMID: 3631685
110. Hubbard KA, Baskerville A, Stephenson JR. Ability of a mutagenized virus variant to protect young lambs from Rift Valley fever. *Am J Vet Res*. 1991;52(1):50–5. <https://doi.org/10.2460/ajvr.1991.52.01.50> PMID: 2021254
111. Baskerville A, Hubbard KA, Stephenson JR. Comparison of the pathogenicity for pregnant sheep of Rift Valley fever virus and a live attenuated vaccine. *Res Vet Sci*. 1992;52(3):307–11. [https://doi.org/10.1016/0034-5288\(92\)90029-2](https://doi.org/10.1016/0034-5288(92)90029-2) PMID: 1620962
112. Morrill JC, Peters CJ. Pathogenicity and neurovirulence of a mutagen-attenuated Rift Valley fever vaccine in rhesus monkeys. *Vaccine*. 2003;21(21–22):2994–3002. [https://doi.org/10.1016/s0264-410x\(03\)00131-2](https://doi.org/10.1016/s0264-410x(03)00131-2) PMID: 12798643
113. Morrill JC, Peters CJ. Mucosal immunization of rhesus macaques with Rift Valley Fever MP-12 vaccine. *J Infect Dis*. 2011;204(4):617–25. <https://doi.org/10.1093/infdis/jir354> PMID: 21791664
114. Ikegami T. Candidate vaccines for human Rift Valley fever. *Expert Opin Biol Ther*. 2019;19(12):1333–42. <https://doi.org/10.1080/14712598.2019.1662784> PMID: 31478397
115. Wichgers Schreur PJ, Oreshkova N, Moormann RJM, Kortekaas J. Creation of Rift Valley fever viruses with four-segmented genomes reveals flexibility in bunyavirus genome packaging. *J Virol*. 2014;88(18):10883–93. <https://doi.org/10.1128/JVI.00961-14> PMID: 25008937
116. Wichgers Schreur PJ, Oreshkova N, van Keulen L, Kant J, van de Water S, Soós P, et al. Safety and efficacy of four-segmented Rift Valley fever virus in young sheep, goats and cattle. *NPJ Vaccines*. 2020;5(1):65. <https://doi.org/10.1038/s41541-020-00212-4> PMID: 32728479
117. Wichgers Schreur PJ, Mooij P, Koopman G, Verstrepen BE, Fagrouch Z, Mortier D, et al. Safety and immunogenicity of four-segmented Rift Valley fever virus in the common marmoset. *NPJ Vaccines*. 2022;7(1):54. <https://doi.org/10.1038/s41541-022-00476-y> PMID: 35585071
118. Halfmann P, Kim JH, Ebihara H, Noda T, Neumann G, Feldmann H, et al. Generation of biologically contained Ebola viruses. *Proc Natl Acad Sci U S A*. 2008;105(4):1129–33. <https://doi.org/10.1073/pnas.0708057105> PMID: 18212124
119. Jacob ST, Crozier I, Fischer WA 2nd, Hewlett A, Kraft CS, Vega M-A de L, et al. Ebola virus disease. *Nat Rev Dis Primers*. 2020;6(1):13. <https://doi.org/10.1038/s41572-020-0147-3> PMID: 32080199
120. Woolsey C, Geisbert TW. Current state of Ebola virus vaccines: A snapshot. *PLoS Pathog*. 2021;17(12):e1010078. <https://doi.org/10.1371/journal.ppat.1010078> PMID: 34882741
121. Henao-Restrepo AM, Camacho A, Longini IM, Watson CH, Edmunds WJ, Egger M, et al. Efficacy and effectiveness of an rVSV-vectored vaccine in preventing Ebola virus disease: final results from the Guinea ring vaccination, open-label, cluster-randomised trial (Ebola Ça Suffit!). *Lancet*. 2017;389(10068):505–18. [https://doi.org/10.1016/S0140-6736\(16\)32621-6](https://doi.org/10.1016/S0140-6736(16)32621-6) PMID: 28017403
122. Marzi A, Feldmann H. Filovirus vaccines as a response paradigm for emerging infectious diseases. *NPJ Vaccines*. 2024;9(1):186. <https://doi.org/10.1038/s41541-024-00985-y> PMID: 39394249
123. El Ayoubi LW, Mahmoud O, Zakhour J, Kanj SS. Recent advances in the treatment of Ebola disease: A brief overview. *PLoS Pathog*. 2024;20(3):e1012038. <https://doi.org/10.1371/journal.ppat.1012038> PMID: 38489257
124. Bray M, Hatfill S, Hensley L, Huggins JW. Haematological, biochemical and coagulation changes in mice, guinea-pigs and monkeys infected with a mouse-adapted variant of Ebola Zaire virus. *J Comp Pathol*. 2001;125(4):243–53. <https://doi.org/10.1053/jcpa.2001.0503> PMID: 11798241
125. Chupurnov AA, Chernukhin IV, Ternovoi VA, Kudoiarova NM, Makhova NM, Azaev MS, et al. Attempts to develop a vaccine against Ebola fever. *Vopr Virusol*. 1995;40(6):257–60. PMID: 8686261
126. Halfmann P, Ebihara H, Marzi A, Hatta Y, Watanabe S, Suresh M, et al. Replication-deficient ebolavirus as a vaccine candidate. *J Virol*. 2009;83(8):3810–5. <https://doi.org/10.1128/JVI.00074-09> PMID: 19211761



127. Halfmann PJ, Borisevich V, Levine CB, Mire CE, Fenton KA, Geisbert TW, et al. The Mucin-Like Domain of the Ebola Glycoprotein Does Not Impact Virulence or Pathogenicity in Ferrets. *J Infect Dis*. 2023;228(Suppl 7):S587–93. <https://doi.org/10.1093/infdis/jiad240> PMID: [37379580](#)
128. Kuroda M, Halfmann P, Kawaoka Y. HER2-mediated enhancement of Ebola virus entry. *PLoS Pathog*. 2020;16(10):e1008900. <https://doi.org/10.1371/journal.ppat.1008900> PMID: [33052961](#)
129. Marzi A, Halfmann P, Hill-Batorski L, Feldmann F, Shupert WL, Neumann G, et al. Vaccines. An Ebola whole-virus vaccine is protective in nonhuman primates. *Science*. 2015;348(6233):439–42. <https://doi.org/10.1126/science.aaa4919> PMID: [25814063](#)
130. Watanabe T. 2024 International Conference on Emerging Infectious Diseases (EID) in the Pacific Rim; 5th March 2024; Incheon, South Korea.
131. Cham K. Sierra Leone to host trial of Ebola vaccine developed at University of Wisconsin-Madison. Available from: <https://manoreporters.com/news/health/sierra-leone-to-host-trial-of-ebola-vaccine-developed-at-university-of-wisconsin-madison/>
132. Warner BM, Safronetz D, Stein DR. Current perspectives on vaccines and therapeutics for Lassa Fever. *Virology*. 2024;21(1):320. <https://doi.org/10.1186/s12985-024-02585-7> PMID: [39702419](#)
133. Lukashevich IS. Advanced vaccine candidates for Lassa fever. *Viruses*. 2012;4(11):2514–57. <https://doi.org/10.3390/v4112514> PMID: [23202493](#)
134. Ambrosio A, Saavedra M, Mariani M, Gamboa G, Maiza A. Argentine hemorrhagic fever vaccines. *Hum Vaccin*. 2011;7(6):694–700. <https://doi.org/10.4161/hv.7.6.15198> PMID: [21451263](#)
135. Lukashevich IS, Pushko P. Vaccine platforms to control Lassa fever. *Expert Rev Vaccines*. 2016;15(9):1135–50. <https://doi.org/10.1080/14760584.2016.1184575> PMID: [27136941](#)
136. Lukashevich IS, Carrion R Jr, Salvato MS, Mansfield K, Brasky K, Zapata J, et al. Safety, immunogenicity, and efficacy of the ML29 reassortant vaccine for Lassa fever in small non-human primates. *Vaccine*. 2008;26(41):5246–54. <https://doi.org/10.1016/j.vaccine.2008.07.057> PMID: [18692539](#)
137. Amaya M, Broder CC. Vaccines to Emerging Viruses: Nipah and Hendra. *Annu Rev Virol*. 2020;7(1):447–73. <https://doi.org/10.1146/annurev-virology-021920-113833> PMID: [32991264](#)
138. Gómez Román R, Tornieporth N, Cherian NG, Shurtleff AC, L'Azou Jackson M, Yeskey D, et al. Medical countermeasures against henipaviruses: a review and public health perspective. *Lancet Infect Dis*. 2022;22(1):e13–27. [https://doi.org/10.1016/S1473-3099\(21\)00400-X](https://doi.org/10.1016/S1473-3099(21)00400-X) PMID: [34735799](#)
139. Orosco FL. Advancing the frontiers: Revolutionary control and prevention paradigms against Nipah virus. *Open Vet J*. 2023;13(9):1056–70. <https://doi.org/10.5455/OVJ.2023.v13.i9.1> PMID: [37842102](#)
140. Schindewolf C, Menachery VD. Middle East Respiratory Syndrome Vaccine Candidates: Cautious Optimism. *Viruses*. 2019;11(1):74. <https://doi.org/10.3390/v11010074> PMID: [30658390](#)
141. Killerby ME, Biggs HM, Midgley CM, Gerber SI, Watson JT. Middle East Respiratory Syndrome Coronavirus Transmission. *Emerg Infect Dis*. 2020;26(2):191–8. <https://doi.org/10.3201/eid2602.190697> PMID: [31961300](#)
142. Li Y-D, Chi W-Y, Su J-H, Ferrall L, Hung C-F, Wu T-C. Coronavirus vaccine development: from SARS and MERS to COVID-19. *J Biomed Sci*. 2020;27(1):104. <https://doi.org/10.1186/s12929-020-00695-2> PMID: [33341119](#)
143. Yong CY, Ong HK, Yeap SK, Ho KL, Tan WS. Recent advances in the vaccine development against Middle East respiratory syndrome-coronavirus. *Front Microbiol*. 2019;10:1781.
144. Maurer G, Buerger V, Larcher-Senn J, Erlsbacher F, Dubischar K, Eder-Lingelbach S, et al. Pooled safety evaluation for a new single-shot live-attenuated chikungunya vaccine†. *J Travel Med*. 2024;31(8):taae133. <https://doi.org/10.1093/jtm/taae133> PMID: [39400050](#)
145. Maurer G, Buerger V, Larcher-Senn J, Erlsbacher F, Meyer S, Eder-Lingelbach S, et al. Comprehensive Assessment of Reactogenicity and Safety of the Live-Attenuated Chikungunya Vaccine (IXCHIQ®). *Vaccines (Basel)*. 2025;13(6):576. <https://doi.org/10.3390/vaccines13060576> PMID: [40573907](#)
146. Kosulin K, Brasel TL, Smith J, Torres M, Bitzer A, Dubischar K, et al. Cross-neutralizing activity of the chikungunya vaccine VLA1553 against three prevalent chikungunya lineages. *Emerg Microbes Infect*. 2025;14(1):2469653. <https://doi.org/10.1080/22221751.2025.2469653> PMID: [39998495](#)
147. van Bree JWM, Visser I, Duyvestyn JM, Aguilar-Bretones M, Marshall EM, van Hemert MJ, et al. Novel approaches for the rapid development of rationally designed arbovirus vaccines. *One Health*. 2023;16:100565. <https://doi.org/10.1016/j.onehlt.2023.100565> PMID: [37363258](#)
148. Pierce KK, Durbin AP, Walsh M-CR, Carmolli M, Sabundayo BP, Dickson DM, et al. TV005 dengue vaccine protects against dengue serotypes 2 and 3 in two controlled human infection studies. *J Clin Invest*. 2024;134(3):e173328. <https://doi.org/10.1172/JCI173328> PMID: [37971871](#)
149. Nogueira ML, Cintra MAT, Moreira JA, Patiño EG, Braga PE, Tenório JCV, et al. Efficacy and safety of Butantan-DV in participants aged 2–59 years through an extended follow-up: results from a double-blind, randomised, placebo-controlled, phase 3, multicentre trial in Brazil. *Lancet Infect Dis*. 2024;24(11):1234–44. [https://doi.org/10.1016/S1473-3099\(24\)00376-1](https://doi.org/10.1016/S1473-3099(24)00376-1) PMID: [39116904](#)
150. Haese NN, Broeckel RM, Hawman DW, Heise MT, Morrison TE, Streblow DN. Animal Models of Chikungunya Virus Infection and Disease. [Review]. 2016;1(suppl 5):S482–s7.
151. Baylis SA, Knezevic I, Almond NM. Harmonising the measurement of neutralising antibodies against chikungunya virus: a path forward for licensing of new vaccines? *Lancet Microbe*. 2024;5(9):100874. [https://doi.org/10.1016/S2666-5247\(24\)00097-1](https://doi.org/10.1016/S2666-5247(24)00097-1) PMID: [38761815](#)
152. Jamrozik E, Littler K, Bull S, Emerson C, Kang G, Kapulu M, et al. Key criteria for the ethical acceptability of COVID-19 human challenge studies: Report of a WHO Working Group. *Vaccine*. 2021;39(4):633–40. <https://doi.org/10.1016/j.vaccine.2020.10.075> PMID: [33341309](#)
153. Impact Global Health. Landscape of Emerging Infectious Disease Research And Development: Lessons Learned. 2024.
